# Supplementary material
Source: publisher figshare collection journal article supplement (https://sage.figshare.com/ndownloader/files/17619059)
Supplement: Supplementary file 1 [file 17619059]

Appendix A: Core features of CAS used in this study. Eligibility criteria: Presence of the first 3 criteria plus one additional item, across at least 2 tasks.

| Feature                                                                                    | Source                                              |
|--------------------------------------------------------------------------------------------|-----------------------------------------------------|
| Lengthened and disrupted coarticulatory transitions between sounds and syllables           | American Speech-Language-Hearing Association (2007) |
| Inappropriate prosody, especially in the realization of lexical or phrasal stress          | American Speech-Language-Hearing Association (2007) |
| Slow DDK rate or disrupted DDK                                                             | Shriberg et al. (2011)                              |
|                                                                                            | Murray et al. (2015)                                |
| Inconsistent errors on consonants and vowels in repeated productions of syllables or words | American Speech-Language-Hearing Association (2007) |
| Difficulty achieving initial articulatory configurations and transitions into vowels       | Shriberg et al. (2011)                              |
| Syllable segregation                                                                       | Shriberg et al. (2011)                              |
| Lexical stress errors or equal stress                                                      | Shriberg et al. (2011)                              |
| Vowel or consonant distortions including distorted substitutions                           | Shriberg et al. (2011)                              |
| Intrusive schwa                                                                            | Shriberg et al. (2011)                              |
| Voicing errors                                                                             | Shriberg et al. (2011)                              |
| Slow rate                                                                                  | Shriberg et al. (2011)                              |
| Increased difficulty with longer or more phonetically complex words                        | Shriberg et al. (2011)                              |
