# Supplementary material
Source: publisher figshare collection journal article supplement (https://sage.figshare.com/ndownloader/files/17619059)
Supplement: Supplementary file 2 [file 17619059]

## Appendix C: DTTC Cueing Hierarchy (adapted from Strand and Skinder, 1999)

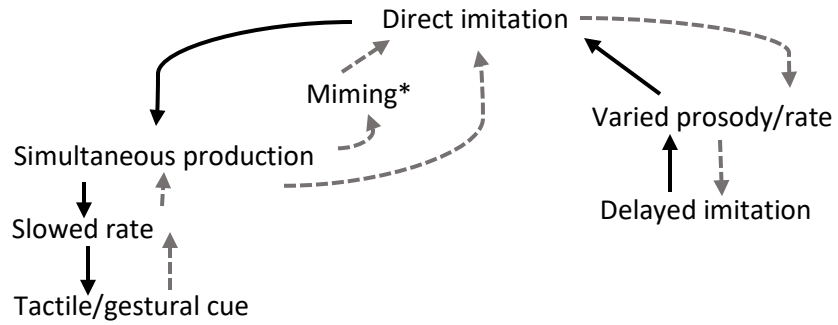

\*used only if movement from simultaneous to direct imitation is not successful

→ Incorrect response

-----> Correct response
