# Supplementary material
Source: publisher figshare collection journal article supplement (https://sage.figshare.com/ndownloader/files/17619059)
Supplement: Supplementary file 3 [file 17619059]

Appendix B: Child participant pre-study assessments.

| Participant | Speech characteristics                                                                                                                                                                                                                                                                                                                                                                                                                                                                                                                                                                                                                            | Test results                                                                                                                                                                             | Treatment Goals and Control Variable                                                                                       |
|-------------|---------------------------------------------------------------------------------------------------------------------------------------------------------------------------------------------------------------------------------------------------------------------------------------------------------------------------------------------------------------------------------------------------------------------------------------------------------------------------------------------------------------------------------------------------------------------------------------------------------------------------------------------------|------------------------------------------------------------------------------------------------------------------------------------------------------------------------------------------|----------------------------------------------------------------------------------------------------------------------------|
| Brian       | <ul style="list-style-type: none"> <li>• Lengthened and/or disrupted coarticulatory transitions between sounds and syllables</li> <li>• Inappropriate prosody – equal stress, vowel distortions, syllable segregation (eg. prolongations)</li> <li>• Slow or disrupted DDK</li> <li>• Inconsistent errors on consonants and vowels in repeated productions of syllables or words</li> <li>• Difficulty achieving initial articulatory configurations and transitions into vowels.</li> <li>• Syllable segregation</li> <li>• Lexical stress errors or equal stress</li> <li>• Vowel or consonant distortions</li> <li>• Voicing errors</li> </ul> | <p>GFTA -2:<br/> DEAP Inconsistency: 68%<br/> DEAP Oral Motor Screen: 45<br/> Reynell: Percentile expressive 1, comprehension 1<br/> DEMSS: 350 (some evidence of at least mild CAS)</p> | <p>Treatment goals: Improve production of single syllable “sh” and “f” words.<br/> Control words: multisyllabic words.</p> |

|          |                                                                                                                                                                                                                                                                                                                                                                                                                                                                                                       |                                                                                                                                                                                           |                                                                                                                                                               |
|----------|-------------------------------------------------------------------------------------------------------------------------------------------------------------------------------------------------------------------------------------------------------------------------------------------------------------------------------------------------------------------------------------------------------------------------------------------------------------------------------------------------------|-------------------------------------------------------------------------------------------------------------------------------------------------------------------------------------------|---------------------------------------------------------------------------------------------------------------------------------------------------------------|
|          | <ul style="list-style-type: none"> <li>• Slow rate</li> <li>• Increased difficulty with longer or more complex words</li> <li>• Stopping fricatives and affricates.</li> <li>• Cluster reduction</li> <li>• Weak Syllable deletion</li> </ul>                                                                                                                                                                                                                                                         |                                                                                                                                                                                           |                                                                                                                                                               |
| Nicholas | <ul style="list-style-type: none"> <li>• Lengthened and/or disrupted coarticulatory transitions between sounds and syllables</li> <li>• Inappropriate prosody – equal stress, vowel distortions, syllable segregation, weak syllable deletion (e.g. prolongations)</li> <li>• Slow or disrupted DDK</li> <li>• Inconsistent errors on consonants and vowels in repeated productions of syllables or words</li> <li>• Syllable segregation</li> <li>• Lexical stress errors or equal stress</li> </ul> | <p>GFTA -2:<br/> DEAP Inconsistency: 68%<br/> DEAP Oral Motor Screen: 15<br/> Reynell: Percentile Comprehension 2, Expressive 0<br/> DEMSS: 333 (some evidence for at least mild CAS)</p> | <p>Target goals:<br/> Improve accuracy of final [v] CVC words<br/> Improve accuracy of [sp] and [st] CCVC words<br/> Control words: [k] 3 syllable words.</p> |

|  |                                                                                                                                                                                                                                                                                                                                                                                                                                                                                                                                                                                                                                              |  |  |
|--|----------------------------------------------------------------------------------------------------------------------------------------------------------------------------------------------------------------------------------------------------------------------------------------------------------------------------------------------------------------------------------------------------------------------------------------------------------------------------------------------------------------------------------------------------------------------------------------------------------------------------------------------|--|--|
|  | <ul style="list-style-type: none"> <li>• Vowel or consonant distortions</li> <li>• Voicing errors</li> <li>• Slow rate</li> <li>• Increased difficulty with longer or more complex words</li> <li>• Stopping [k] and [g]</li> <li>• No [w]</li> <li>• Fricatives are limited and inconsistent. [s] and [ʃ] are most used fricatives.</li> <li>• Mainly single syllable words, bisyllabic words. Some 3 syllables words – usually inaccurate.</li> <li>• Diphthongs usually are simplified.</li> <li>• No clusters</li> <li>• Syllable deletion</li> <li>• Nasal</li> <li>• Reduced phonemic repertoire (limited number of sounds)</li> </ul> |  |  |
|--|----------------------------------------------------------------------------------------------------------------------------------------------------------------------------------------------------------------------------------------------------------------------------------------------------------------------------------------------------------------------------------------------------------------------------------------------------------------------------------------------------------------------------------------------------------------------------------------------------------------------------------------------|--|--|
