# Supplementary material
Source: publisher figshare collection journal article supplement (https://sage.figshare.com/ndownloader/files/17619059)
Supplement: Supplementary file 4 [file 17619059]

## Appendix D Teaching Assistant Fidelity Checklist

| Behaviour                                                               | Yes             | No | N/A |
|-------------------------------------------------------------------------|-----------------|----|-----|
| Provides instructions to child                                          |                 |    |     |
| Moves down hierarchy when judged incorrect                              |                 |    |     |
| Moves up the hierarchy when judged correct                              |                 |    |     |
| Askes child for 3 repetitions when judged correct                       |                 |    |     |
| Correctly uses direct imitation cue                                     |                 |    |     |
| Correctly uses simultaneous cue                                         |                 |    |     |
| Correctly uses slowed rate cue                                          |                 |    |     |
| Correctly uses tactile cue                                              |                 |    |     |
| Correctly uses change of volume or pitch cue                            |                 |    |     |
| Correct uses delayed imitation cue                                      |                 |    |     |
| Correctly judges child's response.                                      |                 |    |     |
| Praises child (not included in fidelity tally – used for feedback only) | Number of times |    |     |
|                                                                         |                 |    |     |
